# Supplementary material for: ContScout: sensitive detection and removal of contamination from annotated genomes
Source: PubMed Central journal article supplement (PMC10831095; doi:10.1038/s41467-024-45024-5), 2024-01-31
Supplement: 41467_2024_45024_MOESM4_ESM.pdf [file 41467_2024_45024_MOESM4_ESM.pdf]

## **Description of Additional Supplementary Files**

### Supplementary Data 1

Description: Synthetic mixtures created to assess ContScout performance

### File name: Supplementary Data 2

Description: Known bacterial HGT events tested screened with ContScout

### File name: Supplementary Data 3

Description: Details of the 844 eukaryote genomes used in the study

### Supplementary Data 4

Description: Proteins identified by ContScout as contamination from the 844-genomes data set

### Supplementary Data 5

Description: High-level taxon summary of proteins removed by ContScout from the 200 most contaminated genomes

### Supplementary Data 6

Description: Details of the 36 genomes used in the study to illustrate the effect of contaminations
